# Supplementary material for: Nanoscale iron carboxylate metal organic frameworks as drug carriers for magnetically aided intracellular delivery
Source: Royal Society of Chemistry journal article supplement (doi:10.1039/c6ra18480d), 2016-01-01
Supplement: c6ra18480d1.pdf [file c6ra18480d1.pdf]

Electronic Supporting Information

Nanoscale iron carboxylate metal organic frameworks as drug carriers for magnetically aided intracellular delivery

Komal Sethi, Shalini Sharma and Indrajit Roy

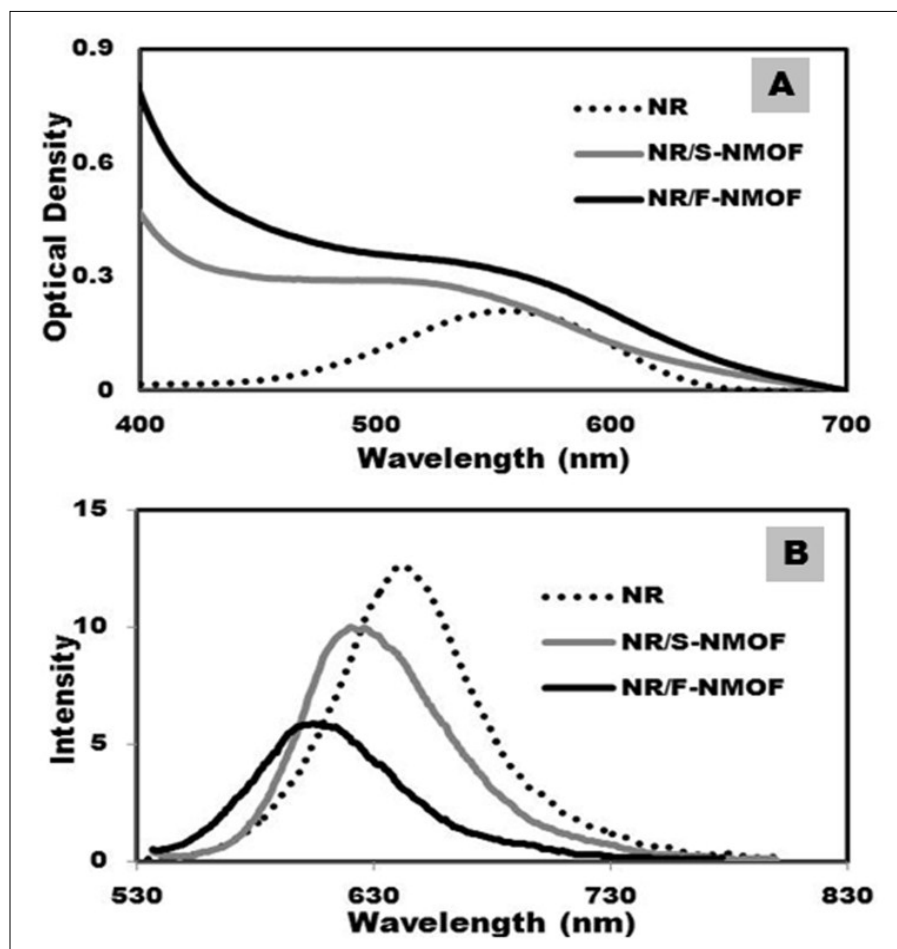

Figure S1: (A) Absorption, and (B) fluorescence emission spectra of free (NR) and nanoencapsulated (NR/S-NMOF and NR/F-NMOF) fluorophores.

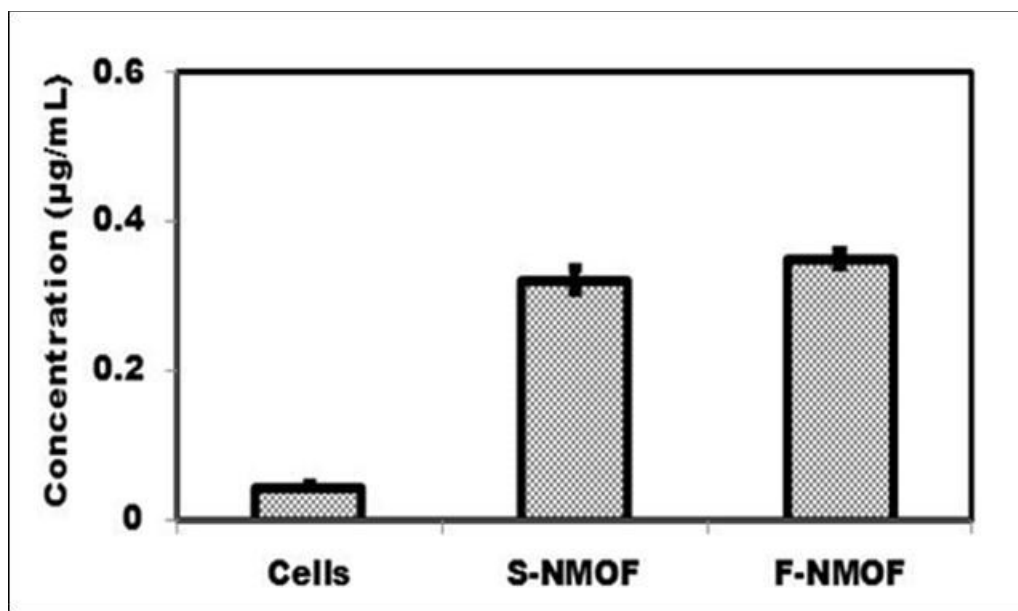

*Figure S2: Comparative cellular uptake efficiency of S-NMOF and F-NMOF by analysing total intracellular Fe(III) concentration.*
